# Supplementary material for: Size-Fractionated Particle Number Concentrations and Daily Mortality in a Chinese City
Source: PubMed Central journal article supplement (PMC3801202; doi:10.1289/ehp.1206398), 2013-08-13
Supplement: ehp.1206398.s001.pdf [file ehp.1206398.s001.pdf]

## **Supplemental Material**

### **Size-Fractionated Particle Number Concentrations and Daily Mortality in a Chinese City**

Xia Meng, Yanjun Ma, Renjie Chen, Zhijun Zhou, Bingheng Chen, and Haidong Kan

#### **Table of contents**

|                                                                                                                                                                                                                                        |   |
|----------------------------------------------------------------------------------------------------------------------------------------------------------------------------------------------------------------------------------------|---|
| Supplemental Material, Table S1. Summary statistics of PNC in warm/cold seasons in Shenyang, China. -----                                                                                                                              | 2 |
| Supplemental Material, Table S2. Percent change (95%CI) in daily mortality associated with IQR and 10-ug/m <sup>3</sup> increases in 2-day moving average particle mass and gaseous pollutant concentrations in Shenyang, China. ----- | 3 |
| Supplemental Material, Table S3. Percent change (95%CI) in daily mortality associated with an IQR increase in 2-day moving average particle fractions in Shenyang, China. -----                                                        | 4 |

**Supplemental Material, Table S1.** Summary statistics of PNC in warm/cold seasons in Shenyang, China.<sup>a</sup>

| Variables                | Mean±SD  | Minimum | Maximum | IQR  |
|--------------------------|----------|---------|---------|------|
| <b>Warm Season</b>       |          |         |         |      |
| PNC <sub>0.25-0.28</sub> | 2800±110 | 380     | 10000   | 2000 |
| PNC <sub>0.28-0.30</sub> | 2100±86  | 260     | 8600    | 1600 |
| PNC <sub>0.30-0.35</sub> | 1400±66  | 170     | 6800    | 1200 |
| PNC <sub>0.35-0.40</sub> | 780±43   | 81      | 4700    | 680  |
| PNC <sub>0.40-0.45</sub> | 350±22   | 28      | 2500    | 300  |
| PNC <sub>0.45-0.50</sub> | 170±12   | 11      | 1400    | 160  |
| PNC <sub>0.50-0.65</sub> | 150±9    | 9       | 1100    | 150  |
| PNC <sub>0.65-1.0</sub>  | 54±4     | 4       | 280     | 48   |
| PNC <sub>1.0-2.5</sub>   | 18±0.8   | 1.0     | 100     | 18   |
| PNC <sub>2.5-10</sub>    | 4±0.2    | 0.1     | 36      | 3    |
| <b>Cold Season</b>       |          |         |         |      |
| PNC <sub>0.25-0.28</sub> | 4300±170 | 540     | 16000   | 3600 |
| PNC <sub>0.28-0.30</sub> | 3300±150 | 380     | 15000   | 2800 |
| PNC <sub>0.30-0.35</sub> | 2300±120 | 250     | 13000   | 2100 |
| PNC <sub>0.35-0.40</sub> | 1300±88  | 140     | 9600    | 1200 |
| PNC <sub>0.40-0.45</sub> | 670±59   | 42      | 6400    | 560  |
| PNC <sub>0.45-0.50</sub> | 400±38   | 16      | 4300    | 320  |
| PNC <sub>0.50-0.65</sub> | 390±39   | 12      | 4300    | 280  |
| PNC <sub>0.65-1.0</sub>  | 160±17   | 4       | 2000    | 120  |
| PNC <sub>1.0-2.5</sub>   | 46±7     | 1.0     | 1900    | 40   |
| PNC <sub>2.5-10</sub>    | 15±8     | 0.1     | 2600    | 8    |

<sup>a</sup> PNC are reported as particles / cm<sup>3</sup>

**Supplemental Material, Table S2.** Percent change (95%CI) in daily mortality associated with IQR and 10-ug/m<sup>3</sup> increases in 2-day moving average particle mass and gaseous pollutant concentrations in Shenyang, China.

|                      | For IQR incremental change |                    |                     | For 10 ug/m <sup>3</sup> incremental change |                    |                    |
|----------------------|----------------------------|--------------------|---------------------|---------------------------------------------|--------------------|--------------------|
|                      | All natural causes         | Cardiovascular     | Respiratory         | All natural causes                          | Cardiovascular     | Respiratory        |
| PM <sub>2.5</sub>    | 2.75 (1.35, 4.15)*         | 2.65 (0.63, 4.68)* | 4.33 (-0.05, 8.71)  | 0.43 (0.21, 0.65)*                          | 0.42 (0.10, 0.73)* | 0.68 (-0.01, 1.36) |
| PM <sub>10</sub>     | 2.71 (1.37, 4.05)*         | 2.45 (0.50, 4.40)* | 4.71 (0.46, 8.96)*  | 0.31 (0.16, 0.47)*                          | 0.28 (0.06, 0.51)* | 0.55 (0.05, 1.04)* |
| PM <sub>10-2.5</sub> | 1.04 (-0.30, 2.37)         | 0.92 (-1.01, 2.85) | 2.05 (-2.27, 6.38)  | 0.28 (-0.08, 0.65)                          | 0.25 (-0.27, 0.78) | 0.56 (-0.62, 1.74) |
| SO <sub>2</sub>      | 2.09 (0.33, 3.84)*         | 1.64 (-0.88, 4.17) | 3.54 (-1.95, 9.03)  | 0.43 (0.07, 0.79)*                          | 0.34 (-0.18, 0.85) | 0.73 (-0.40, 1.85) |
| NO <sub>2</sub>      | 3.49 (2.03, 4.95)*         | 3.26 (1.15, 5.38)* | 6.75 (2.17, 11.32)* | 2.09 (1.22, 2.97)*                          | 1.96 (0.69, 3.23)* | 4.05 (1.30, 6.80)* |

\* p <0.05

**Supplemental Material, Table S3.** Percent change (95%CI) in daily mortality associated with an IQR increase in 2-day moving average particle fractions in Shenyang, China.

| Particle fraction        | All natural causes |                    |                    | Cardiovascular     |                    |                    | Respiratory        |                    |                    |
|--------------------------|--------------------|--------------------|--------------------|--------------------|--------------------|--------------------|--------------------|--------------------|--------------------|
|                          | All period         | Warm               | Cold               | All period         | Warm               | Cold               | All period         | Warm               | Cold               |
| PNC <sub>0.25-0.30</sub> | 2.25 (1.13, 3.36)* | 4.07 (2.32, 5.82)* | 1.80 (-0.14, 3.75) | 2.62 (1.00, 4.23)* | 4.39 (1.77, 7.00)* | 2.08 (-0.70, 4.87) | 0.74 (-2.77, 4.24) | 3.61 (-2.12, 9.35) | 1.15 (-4.89, 7.19) |
| PNC <sub>0.30-0.50</sub> | 1.31 (0.52, 2.09)* | 3.15 (1.55, 4.75)* | 1.05 (-0.35, 2.44) | 1.62 (0.49, 2.76)* | 3.12 (0.72, 5.52)* | 1.45 (-0.54, 3.44) | 0.85 (-1.61, 3.31) | 2.63 (-2.65, 7.91) | 1.28 (-3.02, 5.58) |
| PNC <sub>0.50-1.0</sub>  | 0.29 (-0.10, 0.68) | 2.42 (0.80, 4.03)* | 0.16 (-0.59, 0.91) | 0.54 (-0.02, 1.10) | 1.91 (-0.52, 4.34) | 0.47 (-0.60, 1.54) | 0.61 (-0.59, 1.80) | 3.66 (-1.59, 8.91) | 0.62 (-1.67, 2.91) |

\* P<0.05
